# Supplementary material
Source: PubMed Central journal article supplement (PMC150229)
Supplement: nar_31_4_1156__1.pdf [file nar_31_4_1156__1.pdf]

## SUPPLEMENTARY MATERIAL

**Figure S1.** AFM images of the G-wire formation of d(G<sub>4</sub>T<sub>4</sub>G<sub>4</sub>) induced by Ca<sup>2+</sup>. All AFM measurements of 25 μM d(G<sub>4</sub>T<sub>4</sub>G<sub>4</sub>) at room temperature were carried out after 3-hour incubation at 45°C in a buffer containing 100 mM NaCl, and 50 mM MES (pH 6.1): (a) without and (b) with 100 mM CaCl<sub>2</sub>.

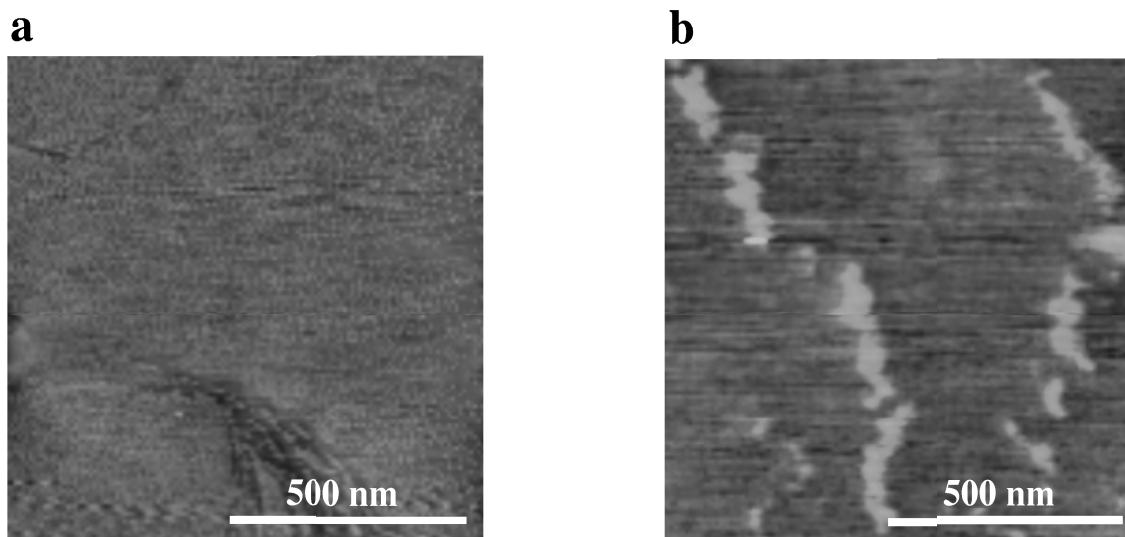

**Figure S1**
